# Supplementary material for: Soluble conducting polymer-functionalized graphene oxide for air-operable actuator fabrication
Source: Royal Society of Chemistry journal article supplement (doi:10.1039/c3ta14734g), 2014-01-01
Supplement: c3ta14734g.pdf [file c3ta14734g.pdf]

# Electronic Supplementary Information

---

## **Soluble Conducting Polymer-Functionalized Graphene Oxide for Tunable Actuator Fabrication**

**Madeshwaran Sekkarapatti Ramasamy,<sup>a</sup> Sibdas Singha Mahapatra,<sup>a</sup> Hye Jin Yoo,<sup>a</sup> Yoong Ahm Kim,<sup>b</sup> Jae Whan Cho<sup>a\*</sup>**

<sup>a</sup> Department of Organic and Nano System Engineering, Konkuk University, Seoul 143-701, Republic of Korea

<sup>b</sup> Department of Polymer & Fiber System Engineering, Chonnam National University, Gwangju 500-757, Republic of Korea

\*Corresponding author. Tel: +82-2-450-3513; Fax: +82-2-457-8895;

E-mail: jwcho@konkuk.ac.kr

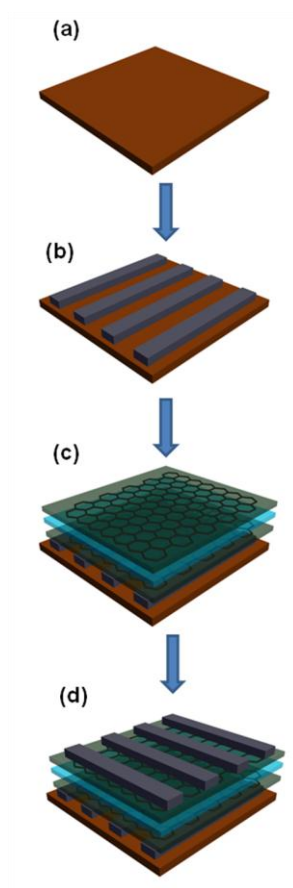

**Fig. S1.** Schematic diagram of fabrication process for dry conducting polymer actuator: (a) polyimide film, (b) deposition of bottom Al electrode, (c) spin coating of trilayer actuator configuration (active layer/solid polymer electrolyte/active layer), and (d) deposition of top Al electrode.

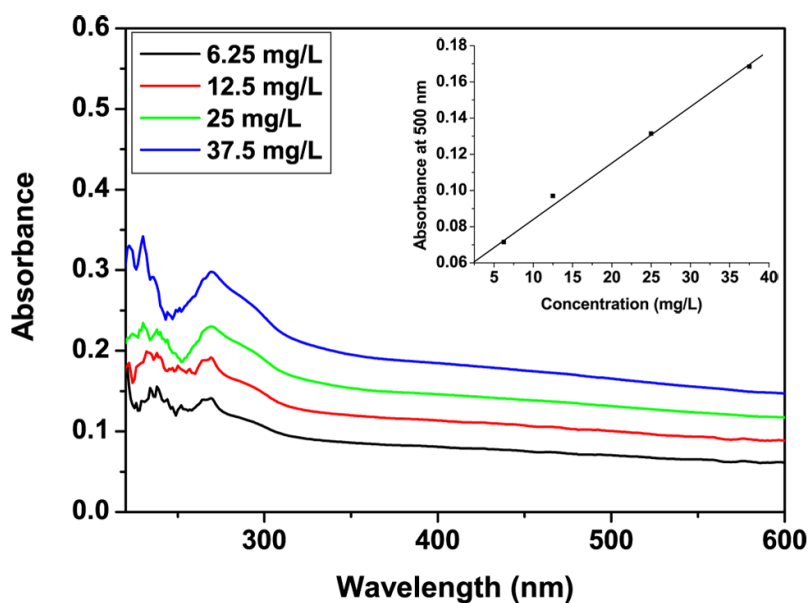

**Fig. S2.** Concentration dependence of UV–Vis absorption spectra of GO-f-PTAA-co-PTh in DMF solution with different concentrations of 6.25, 12.5, 25, and 37.5 mg/L. The inset shows the absorbance at 500 nm of the solution with different concentration.

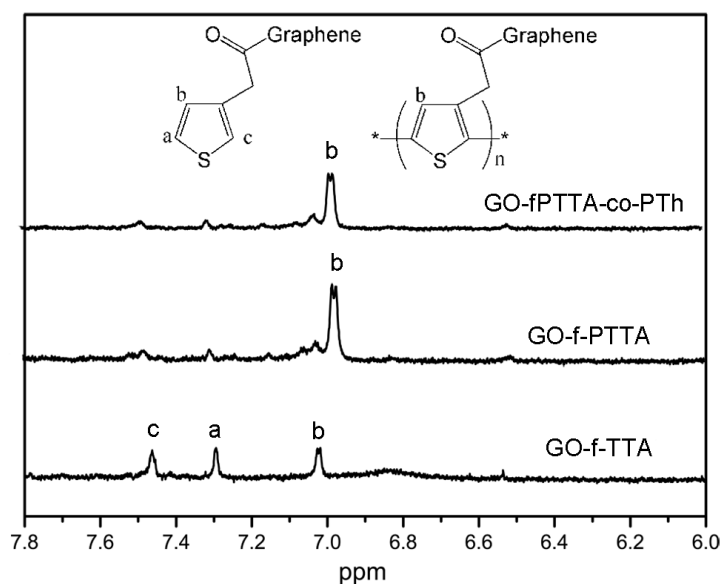

**Fig. S3.**  $^1\text{H}$ -NMR spectra of GO-f-TAA, GO-f-PTAA, and GO-f-PTAA-co-PTh composites.

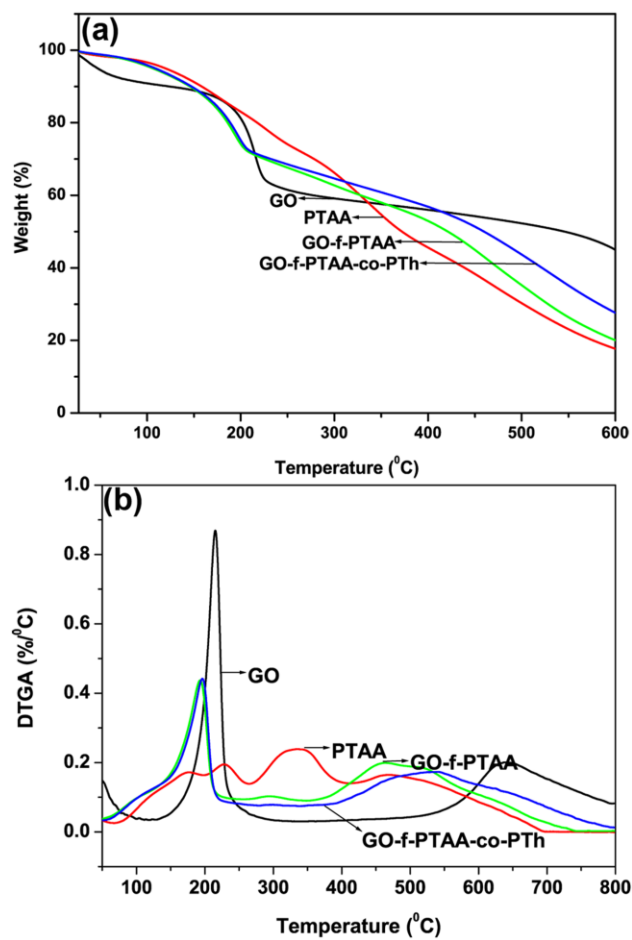

**Fig. S4.** (a) Thermogravimetric (TGA) curves of GO, PTAA, GO-f-PTAA, and GO-f-PTAA-co-PTh composites and (b) derivative TGA curves of the respective samples.

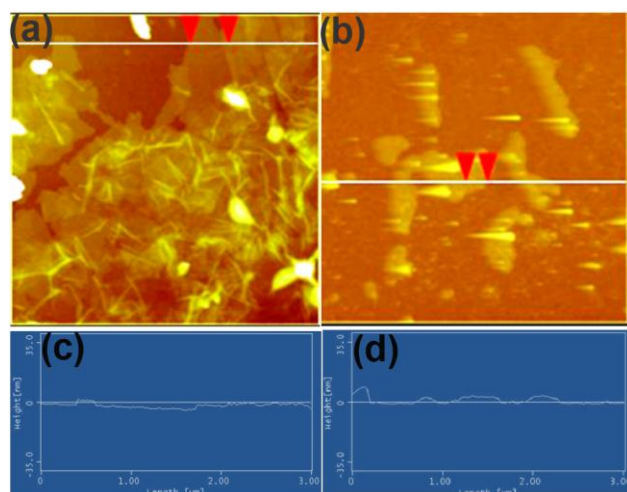

**Fig. S5.** Atomic force microscopy images of (a) GO and (b) GO-f-PTAA-co-PTh composites.

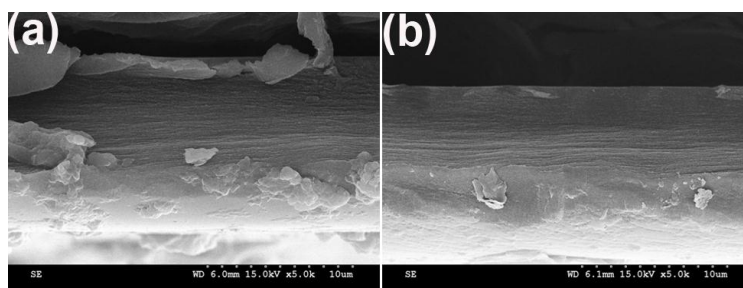

**Fig. S6.** Cross-sectional scanning electron microscopy images of GO-f-PTAA-co-PTh actuator device.
